# The Crz1/Sp1 Transcription Factor of *Cryptococcus neoformans* Is Activated by Calcineurin and Regulates Cell Wall Integrity

Sophie Lev<sup>1</sup>, Desmarini Desmarini<sup>1</sup>, Methee Chayakulkeeree<sup>2</sup>, Tania C. Sorrell<sup>1</sup>, Julianne T. Djordjevic<sup>1\*</sup>

**1** Centre for Infectious Diseases and Microbiology, Sydney Medical School and Westmead Millennium Institute, University of Sydney, Westmead, New South Wales, Australia, **2** Faculty of Medicine, Siriraj Hospital, Mahidol University, Bangkok, Thailand

## Abstract

*Cryptococcus neoformans* survives host temperature and regulates cell wall integrity via a calcium-dependent phosphatase, calcineurin. However, downstream effectors of *C. neoformans* calcineurin are largely unknown. In *S. cerevisiae* and other fungal species, a calcineurin-dependent transcription factor Crz1, translocates to nuclei upon activation and triggers expression of target genes. We now show that the *C. neoformans* Crz1 ortholog (Crz1/Sp1), previously identified as a protein kinase C target during starvation, is a *bona fide* target of calcineurin under non-starvation conditions, during cell wall stress and growth at high temperature. Both the calcineurin-defective mutant,  $\Delta cna1$ , and a *CRZ1/SP1* mutant ( $\Delta crz1$ ) were susceptible to cell wall perturbing agents. Furthermore, expression of the chitin synthase encoding gene, *CHS6*, was reduced in both mutants. We tracked the subcellular localization of Crz1-GFP in WT *C. neoformans* and  $\Delta cna1$  in response to different stimuli, in the presence and absence of the calcineurin inhibitor, FK506. Exposure to elevated temperature (30–37°C vs 25°C) and extracellular calcium caused calcineurin-dependent nuclear accumulation of Crz1-GFP. Unexpectedly, 1M salt and heat shock triggered calcineurin-independent Crz1-GFP sequestration within cytosolic and nuclear puncta. To our knowledge, punctate cytosolic distribution, as opposed to nuclear targeting, is a unique feature of *C. neoformans* Crz1. We conclude that Crz1 is selectively activated by calcium/calcineurin-dependent and independent signals depending on the environmental conditions.

**Citation:** Lev S, Desmarini D, Chayakulkeeree M, Sorrell TC, Djordjevic JT (2012) The Crz1/Sp1 Transcription Factor of *Cryptococcus neoformans* Is Activated by Calcineurin and Regulates Cell Wall Integrity. PLoS ONE 7(12): e51403. doi:10.1371/journal.pone.0051403

**Editor:** Robert A. Cramer, Dartmouth, United States of America

**Received:** September 19, 2012; **Accepted:** November 1, 2012; **Published:** December 12, 2012

**Copyright:** © 2012 Lev et al. This is an open-access article distributed under the terms of the Creative Commons Attribution License, which permits unrestricted use, distribution, and reproduction in any medium, provided the original author and source are credited.

**Funding:** This work was supported by a University of Sydney Bridging grant (for SL), a National Health and Medical Research Council of Australia grant and a Sydney Medical School Foundation Fellowship and grant from the SMS Foundation to the Sydney Institute for Emerging Infections and Biosecurity, University of Sydney (for TCS). The funders had no role in study design, data collection and analysis, decision to publish, or preparation of the manuscript.

**Competing Interests:** The authors have declared that no competing interests exist.

\* E-mail: julianne.djordjevic@sydney.edu.au

## Introduction

*Cryptococcus neoformans* var. *grubii* causes life-threatening meningo-encephalitis especially in immunosuppressed individuals, including recipients of organ transplants. In this group, mortality approaches 40% in those with central nervous system infection [1,2]. To prevent rejection of the transplanted organ, patients are treated with calcineurin inhibitor-based immunosuppressants that block signal transduction events required for T-cell activation.

Calcineurin is a conserved Ca<sup>2+</sup>-calmodulin-dependent serine-threonine-specific protein phosphatase consisting of a catalytic (CNA) and regulatory (CNB) subunit. The structure of calcineurin is maintained by two chaperones, cyclophilin A and FKBP12 [3]. Cyclosporine (CsA) and tacrolimus (FK506) inhibit calcineurin by binding cyclophilin A and FKBP12, respectively. These compounds target not only the mammalian but also the fungal homologues of calcineurin and therefore possess both, anti-rejection and antifungal activities. Targeting of calcineurin in *C. neoformans* with immunosuppressive inhibitors, or their non-immunosuppressive derivatives, combined with other antifungals, opens a new and promising avenue for drug development [4]. In fact, a synergistic effect of FK506 combined with bafilomycin A1,

fluconazole, or caspofungin acetate has already been demonstrated *in vitro* [5].

In fungi, calcineurin confers resistance to environmental stresses, such as heat and high cation concentration. In *C. neoformans* functional calcineurin is required for growth at host physiological temperature and hyphal elongation during mating and monokaryotic fruiting. [6,7]. Calcineurin affects cellular function by dephosphorylating its substrate proteins. In *C. neoformans*, the phospholipid binding protein Cts1 was identified as a calcineurin substrate during high temperature stress [8].

The major substrate of calcineurin in *S. cerevisiae* is the transcription factor Crz1 [9]. Following dephosphorylation, activated Crz1 translocates from the cytosol to the nucleus to trigger expression of genes with promoters that contain the calcineurin-dependent response element (CDRE) [9,10]. *S. cerevisiae* Crz1 regulates genes involved in ion transport, cell wall synthesis and maintenance, lipid and sterol metabolism, vesicle transport and protein degradation [9]. Crz1 orthologs have been identified in human and plant fungal pathogens, where they are strongly associated with virulence and resistance to stress [11–16]. A homolog of Crz1 in *C. neoformans* designated Sp1 has recently been characterized [17]. Under conditions of glucose starvation, the gene expression profile of the *SP1*

deletion mutant, *Asp1*, closely correlated with the expression profile of a PKC deletion mutant, *Δpkc1*, but not with that of the calcineurin mutant, *Δcna1*. Moreover, overexpression of *SP1* partially restored cell wall integrity defects in *Δpkc1*. Based on these findings, [17] proposed that Crz1/Sp1 is regulated by Pkc1 phosphorylation in glucose-starved cells. However, potential regulation of Sp1 by calcineurin has not been tested under conditions other than glucose starvation.

Although calcineurin represents a promising target for anti-fungal drug development, surprisingly little is known about the mechanism of its activation in *C. neoformans*, or the identity of its downstream targets. Recently, Kozubowski *et al* reported that, in *C. neoformans*, GFP-tagged calcineurin accumulated in the bud neck of mother cells, and in puncta associated with the ER, following a rapid increase in environmental temperature [18,19]. The GFP-tagged calcineurin co-localized with components of ER-Golgi trafficking machinery and with mRNA processing structures, identified as P-bodies and stress granules. In the present study we established *C. neoformans* Crz1/Sp1 (hereafter referred to as Crz1) as a *bona fide* ortholog of *S. cerevisiae* Crz1 by demonstrating its interaction with calcineurin and its calcineurin-dependent nuclear localization. Like other fungal CRZ proteins, *C. neoformans* Crz1 accumulated in nuclei in response to Ca<sup>2+</sup> and physiological temperature. However, unlike its fungal counterparts, CnCrz1 migrated to cytosolic and nuclear puncta in response to heat shock and salt stress.

## Results

### Identification of the Crz1 Ortholog in *C. neoformans*

The transcription factor, Crz1, has been identified as a calcineurin substrate in numerous filamentous fungi and yeast, including *S. cerevisiae* and *Candida albicans*. Fungal Crz1 orthologs share little sequence similarity, except at the C-terminus, which contains two or three zinc finger domains [15]. Using the zinc finger domains of *S. cerevisiae* Crz1 in a similarity search, we identified a putative Crz1 ortholog in the *C. neoformans* Serotype A genome. The predicted Crz1 protein (1094 amino acids, CNAG\_00156), which contained three Zn finger domains, shares 94% identity with its homolog in *C. neoformans* serotype D, and, in the DNA binding domain, 44% identity with *S. cerevisiae* Crz1. While the C-terminal zinc finger-containing domain of *C. neoformans* Crz1 (CnCrz1) is highly similar to other fungal CRZ proteins (Fig. 1A, S1), the N-terminal domain is unique to *C. neoformans*. We identified a short glutamine-rich region in CnCrz1 which is also found in *S. cerevisiae* Crz1. Phylogenetic analysis performed using the conserved Zn finger DNA binding domain, positioned CnCrz1 inside the cluster of Crz1 orthologs, while clearly separating them from their closest homologs represented by the *S. cerevisiae* transcription factors, Ace2 and Swi5 (Fig. 1B).

Yeast two hybrid analysis has been used to demonstrate the interaction of CRZ with subunit A of calcineurin in *S. cerevisiae* [20] and *Magnaporthe oryzae* [14]. We used the same strategy to investigate the interaction of *C. neoformans* Crz1 with calcineurin. Cna1 and Crz1 were fused to GAL4 binding (BD) and activation (AD) domains, respectively. Yeast expressing both *BD-CNA1* and *AD-CRZ1* grew in the absence of adenine and exhibited high β-galactosidase activity, demonstrating direct interaction between *C. neoformans* Cna1 and Crz1. Surprisingly, Cna1-Crz1 interaction was not disrupted in the presence of the calcineurin inhibitor, FK506, indicating that Cna1 interacts with Crz1 in its inactive state (Fig. 2).

### Cell Wall Integrity is Compromised in Crz1 and Cna1 Deletion Mutants

To assess which of the *C. neoformans* calcineurin functions are relayed via Crz1, we deleted the *CRZ1* gene and compared the mutant phenotype with *Δcna1* (Fig. 3). The calcineurin-dependent phenotypes tested included growth at 37°C, cell wall integrity, susceptibility to ionic stress and production of mating filaments. Two other major virulence factors, capsule and melanin production, were also assessed. Growth of *Δcna1*, as compared to wild type, was compromised at human physiological temperature (37°C) and in the presence of CaCl<sub>2</sub>, NaCl, calcofluor white (CFW) and Congo red (Fig. 3). Of all the conditions tested, *Δcrz1* exhibited elevated sensitivity to the cell wall perturbing agents, CFW and Congo red. Reconstitution of the *Δcrz1* mutant with genomic *CRZ1* restored the *Δcrz1* phenotype back to that of WT (Fig. 3). Similar to the WT, *Δcrz1* produced capsule and melanin under inducing conditions, and, unlike *Δcna1*, formed abundant filaments during unilateral mating (Fig. S2).

### Nuclear Localization of CnCrz1 is Calcineurin-dependent

Fungal Crz1 shuttles between the cytosol and nucleus according to its activation state, and hence can be used as a reporter of calcineurin activity in response to environmental stimuli. In order to track the subcellular localization of Crz1, we replaced the endogenous *CRZ1* with a *CRZ1-GFP* gene fusion (Fig. S3). The resulting strain exhibited WT tolerance to CFW confirming that Crz1 function is not compromised by the addition of the C-terminal GFP tag (Fig. S4).

In cells grown to early exponential phase at room temperature (~25°C), the Crz1-GFP fusion protein was distributed between cytosol and nuclei. However, in cells grown at higher temperatures (30–37°C), Crz1-GFP localized primarily in nuclei (Fig. 4). In some cells autofluorescence (visible as a ring around the cell) was comparable to the fluorescence of tagged Crz1 which is weak due to low *CRZ1* expression from the endogenous promoter. To confirm the dependency of CnCrz1 subcellular localization on calcineurin activity, we added the calcineurin inhibitor, FK506, to the culture grown at 37°C. Within 1 hour of FK506 treatment, Crz1-GFP was completely excluded from nuclei (Fig. 4). In filamentous fungi and *S. cerevisiae*, Crz1 also translocates to nuclei in response to extracellular calcium [10,14,21,22]. Similarly, we found that addition of 100–300 mM CaCl<sub>2</sub> to *C. neoformans* cells grown at 25°C triggered nuclear localization of Crz1 (Fig. 4). The effect of 37°C and calcium addition on the intensity of Crz1-GFP fluorescence associated with nuclei was also quantified (Fig. 4B), and the results confirm the observations in Figure 4A. These findings are consistent with CnCrz1 functioning downstream of calcineurin and establish CnCrz1 as an ortholog of Crz1 of *S. cerevisiae* and other fungi.

### Calcineurin/Crz1 Induces Expression of Chitin Synthase-encoding *CHS6* in Response to Cell Wall Stress

Several lines of evidence prompted us to test whether the chitin synthase gene, *CHS6* (CNAG\_00546), is a potential target of calcineurin signaling: first, both *Δcna1* and *Δcrz1* are sensitive to CFW, a cell wall perturbing agent that binds chitin and blocks formation of the fibrillar lattice [23]; second, *CHS6* is induced in *C. neoformans* grown at 37°C, conditions under which calcineurin is essential for viability [24], and third, chitin synthase genes are regulated by calcineurin and Crz1 in *S. cerevisiae* and *Magnaporthe oryzae* [9,14]. Treatment of *C. neoformans* with FK506 caused a marked reduction in *CHS6* expression in WT, but not in *Δcna1* or *Δcrz1* (Fig. 5A and B), consistent with

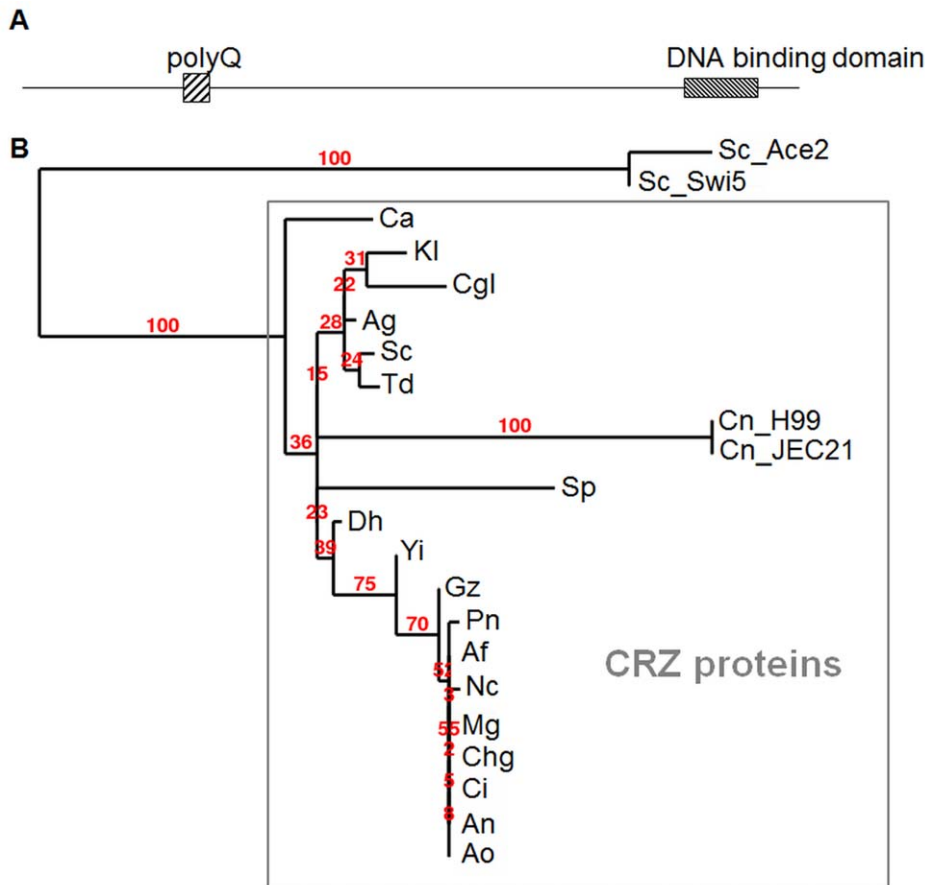

**Figure 1. Sequence analysis of *C. neoformans* Crz1 and comparison with other fungal species.** (A) Diagram of the Crz1 functional domains. (B) Phylogenetic tree of fungal CRZ proteins based on the alignment of their Zn finger DNA-binding domains. Bootstrap values are indicated. *S. cerevisiae* Swi5 and Ace2 represent transcription factors related to ScCrz1. Cn\_H99, *Cryptococcus neoformans* serotype A; Cn\_JEC21, XP\_566613, *C. neoformans* serotype D; An, BAE94327, *Aspergillus nidulans*; Ao, BAE57003, *Aspergillus oryzae*; Af, EAL88401, *Aspergillus fumigatus*; Mo, XP\_359644, *Magnaporthe oryzae*; Nc, EAA32849, *Neurospora crassa*; EAQ88414, Chg, *Chaetomium globosum*; Gz, XP\_381517, *Gibberella zeae*; Ci, XP\_001244584, *Coccidioides immitis*; Pn, EAT87393, *Phaeosphaeria nodorum*; Dh, CAG84727, *Debaryomyces hansenii*; Td, AAZ04388, *Torulopsis delbrueckii*; Ag, AAS51722, *Ashbya gossypii*; Sc, CAA95889, *Saccharomyces cerevisiae*; Kl, CAG99429, *Kluyveromyces lactis*; Yi, CAG80473, *Yarrowia lipolytica*; Ca, EAK97605, *Candida albicans*; Cgl, CAG62620, *Candida glabrata*; Sp, Q09838, *Schizosaccharomyces pombe*; Cd, CAX43071, *Candida dubliniensis*; Sc\_Ace2, CAA97702, *Saccharomyces cerevisiae*; Sc\_Swi5, CAA90369, *Saccharomyces cerevisiae*. Indicate what the red numbers mean. doi:10.1371/journal.pone.0051403.g001

*CHS6* being regulated by calcineurin via Crz1. The reduction of *CHS6* expression in WT following addition of FK506 was even more pronounced in the presence of CFW. We therefore tested expression of *CHS6* in WT,  $\Delta$ *cna1* and  $\Delta$ *crz1* following addition of CFW. In untreated cultures, expression of *CHS6* was consistently lower in both mutants, as compared to wild type (Fig. 5C). CFW treatment triggered, on average, a 2.5-fold induction of *CHS6* in wild type, but not in the mutants, where the *CHS6* expression levels remained similar to those of untreated cells. These results suggest that *CHS6* is regulated by the calcineurin/Crz1 signaling pathway under normal and cell wall stress conditions. Furthermore, in agreement with this finding, CFW caused a moderate increase in the amount of nuclear Crz1-GFP (Fig. 5D).

We also tested the expression of *CHS6* and *CRZ1* under different temperatures, during calcium-induced and cell wall stress. Surprisingly, expression of *CRZ1* was down-regulated at 37°C and in the presence of calcium (Fig. 5E), conditions which trigger nuclear targeting of Crz1 (Fig. 4). However, following exposure to CFW, *CRZ1* expression was up-regulated, similar to *CHS6*. In the presence of calcium, expression of *CHS6* was

markedly reduced, indicating that nuclear localization of Crz1 is not sufficient to induce *CHS6* expression.

### Differential Response of Crz1 to Stress

We investigated the subcellular localization of Crz1-GFP in response to severe stress caused by exposure of *C. neoformans* to 1 M NaCl or to heat shock at 42°C for 5 minutes. Unexpectedly, these treatments caused Crz1-GFP to localize to distinct cytosolic and nuclear puncta (Fig. 6 and Fig. S5). This was in contrast to the translocation of Crz1-GFP to the nucleus which we observed with continuous incubation at 37°C, or the addition of extracellular calcium (Fig. 4 and Fig. S5). Salt-induced puncta were distributed evenly in the cytosol, while heat stress-induced puncta were more centered in and around the nucleus. The transient nature of these fluorescent puncta was indicated by their gradual disappearance following the removal of salt where, by one hour post-washing, all puncta had disappeared. These puncta were not observed if the cells were gradually acclimatized to increasing concentrations of NaCl. Importantly, addition of FK506 did not interfere with formation of puncta in response to NaCl (not shown) and heat shock, but

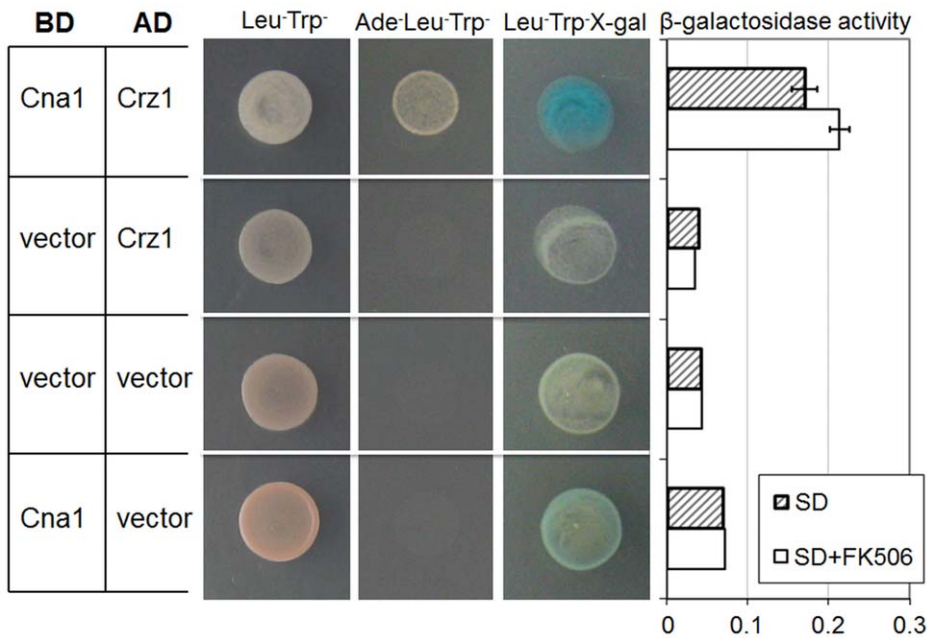

**Figure 2. Yeast two hybrid analysis of Cna1 and Crz1 interaction.** BD and AD designate GAL4 binding and activation domains fused to Cna1 and Crz1 respectively, where applicable. Vector equals empty vector. All combinations of transformants grew in the absence of Leu and Trp confirming plasmid retention in the parent strain. However, only yeast transformed with plasmids containing *CNA1* and *CRZ1* grew in the absence of Ade confirming an interaction which allows expression of Ade biosynthetic machinery. Quantitative analysis of  $\beta$ -galactosidase activity was performed using ONPG as a substrate. For this test, the cells were grown on SD Leu-Trp<sup>-</sup> plates with or without 1  $\mu$ g/ml FK506. Error bars represent standard deviation.

doi:10.1371/journal.pone.0051403.g002

caused nuclear exclusion of Crz1-GFP in stressed, as well as in non-stressed cells (Fig. 7). These findings indicate that association of Crz1-GFP with puncta occurs independently of calcineurin activity.

### Calcineurin Protein is not Required for Sequestration of Crz1 to Cytosolic Puncta

Calcineurin is known to have functions that are dependent and independent of its phosphatase activity [25]. We therefore considered the possibility that, independent of its catalytic activity, calcineurin protein is required for Crz1 sequestration to

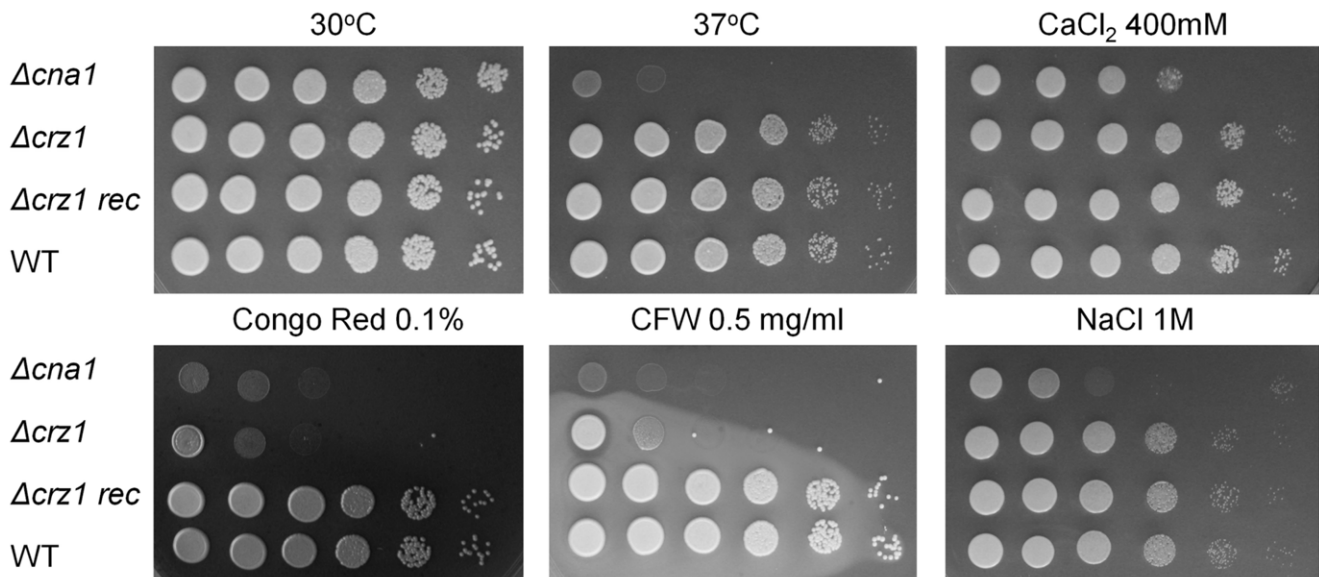

**Figure 3. *Δcna1* and *Δcrz1* mutants share sensitivity to cell wall perturbing agents.** WT H99, *Δcna1*, *Δcrz1* and *Δcrz1-rec* (serially-diluted 10-fold, 10<sup>6</sup>-10 cells/spot from left to right) were spotted on YPD plates supplemented with NaCl, CaCl<sub>2</sub>, calcofluor white (CFW) or Congo Red as indicated, and incubated at 30°C. Thermosensitivity of the mutants was tested at 37°C on YPD plates.

doi:10.1371/journal.pone.0051403.g003

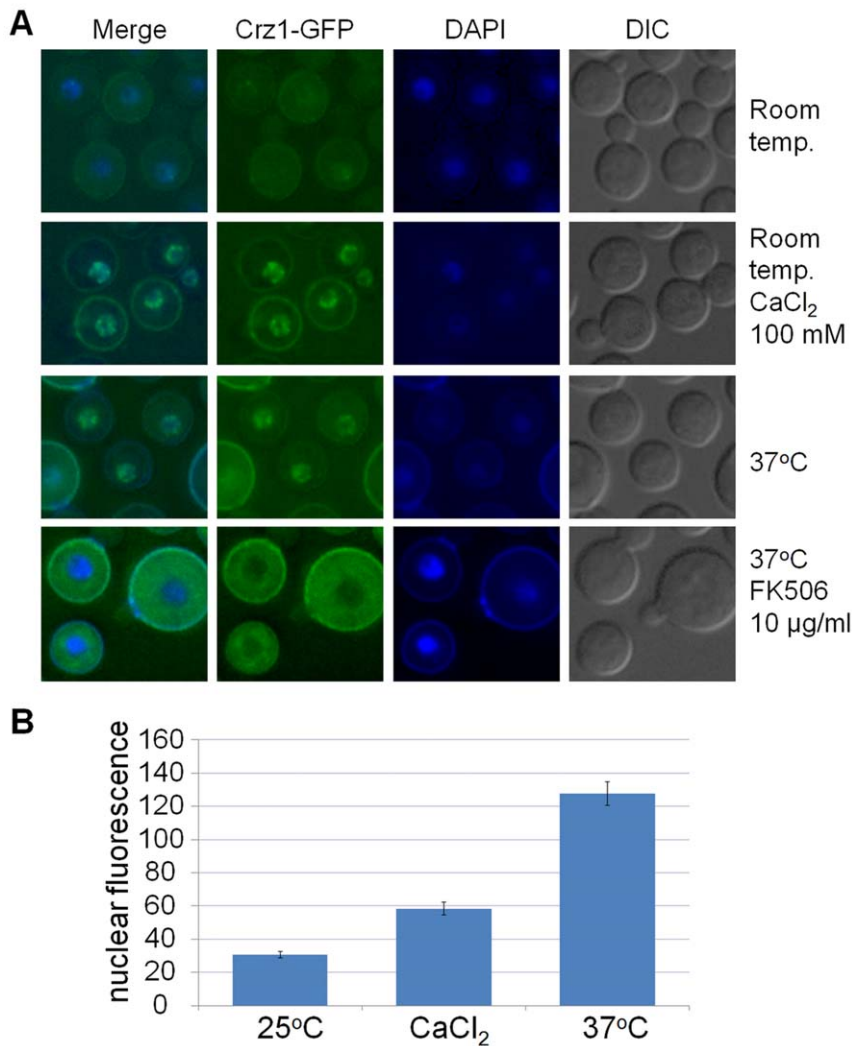

**Figure 4. Nuclear targeting of Crz1-GFP is calcineurin-dependent and triggered by addition of calcium and elevated temperature.** (A) Cells grown at room temperature show predominantly cytosolic Crz1-GFP localization. In cells treated with CaCl<sub>2</sub> or grown at 37°C, Crz1-GFP is predominantly nuclear. The calcineurin inhibitor FK506 causes nuclear exclusion of Crz1-GFP at 37°C. (B) Quantification of the fluorescence intensity of nuclear Crz1-GFP. The differences between treated and untreated cells are statistically significant (n = 61 for 25°C control, n = 47 for CaCl<sub>2</sub>-treated cells and n = 50 for 37°C-grown culture; P < 0.0001 using an unpaired two-tailed t-test with Welch correction). Error bars represent standard errors. doi:10.1371/journal.pone.0051403.g004

cytosolic puncta upon exposure to salt or heat stress. We therefore tracked the *Crz1-GFP* reporter in the calcineurin deletion mutant. As expected, Crz1-GFP was excluded from the nuclei under normal growth conditions (room temperature), and following addition of 300 mM CaCl<sub>2</sub> or CFW (Fig. 8 and Fig. S6, respectively). However, upon exposure of the cells to 1 M NaCl, Crz1-GFP formed puncta closely resembling those formed in the WT strain with a functional Cna1 (Fig. 8). These findings suggest that Crz1-GFP responds differentially to two different types of stimuli. A stimulus of the first type, which proceeds via Ca<sup>2+</sup>/calcineurin, triggers Crz1-GFP nuclear translocation. A stimulus of the second type, which proceeds independently of calcineurin, causes Crz1-GFP to accumulate in punctate structures. Heat shock is likely to provide a combination of two stimuli causing Crz1-GFP to form puncta in and around the nucleus.

#### Crz1-GFP does not Co-localize with Stress Granules Formed Under Heat and Salt Stress

In *C. neoformans*, calcineurin has been reported to respond to a rapid temperature shift (from 25°C to 37°C) by co-localizing with ER-Golgi trafficking machinery and mRNA processing structures in puncta centered around the nucleus. These mRNA processing structures were identified as P-bodies and stress granules [18]. P-bodies are considered to be focal points for mRNA degradation. They are present in unstressed cells, but increase in number following stress. In contrast, stress granules are formed specifically in response to severe stress, similar to the Crz1-GFP puncta shown in Figure 6. This prompted us to investigate stress granules as a potential destination of Crz1-GFP following severe stress. In order to visualize stress granules, we tagged the polyA-binding protein marker (Pab) with dsRed. In the absence of stress, Pab-dsRed fluorescence was visible as a tight ring around the nucleus and was evenly distributed throughout the cytosol. Following NaCl treatment or heat shock, Pab-dsRed distribution became patchy with a few peaks

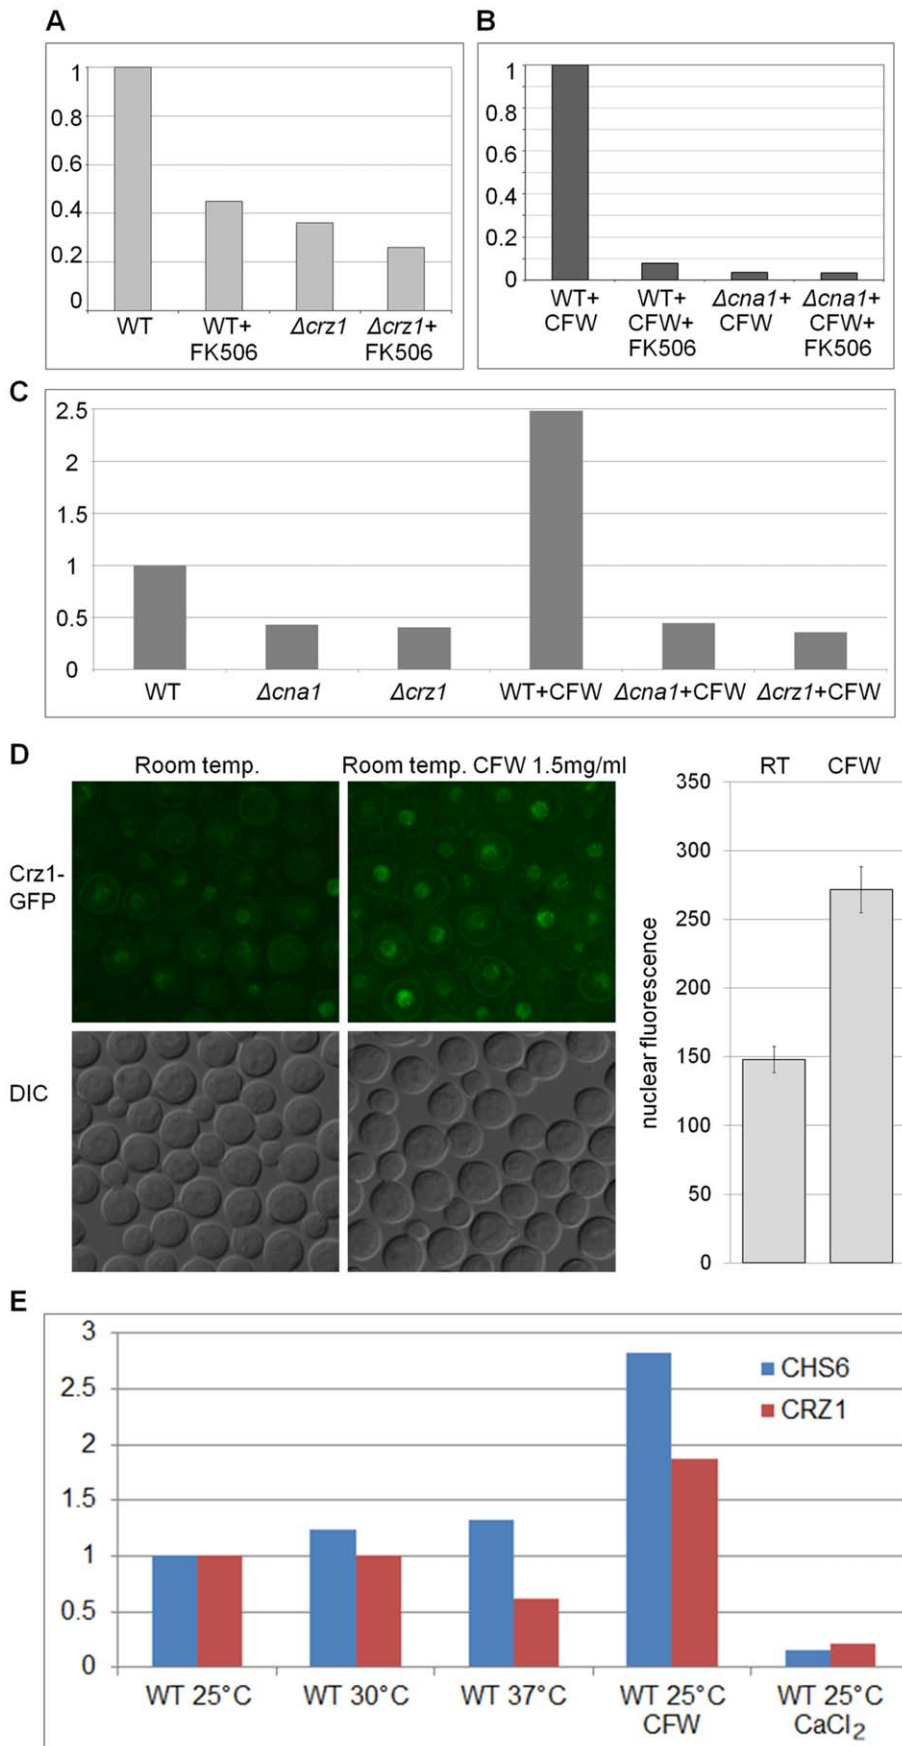

**Figure 5. Calcofluor white triggers calcineurin/Crz1-dependent expression of chitin synthase *CHS6* and nuclear accumulation of Crz1-GFP.** (A) Expression of *CHS6* in YPD-grown WT and  $\Delta crz1$  with or without FK506 (10  $\mu\text{g/ml}$ ). The bar graph represents sqPCR data and is the average of two independent experiments. (B) Expression of *CHS6* in WT and  $\Delta cna1$  grown in YPD and exposed to CFW (2.2 mg/ml) or CFW+FK506 (10  $\mu\text{g/ml}$ ) for 1 hour. *CHS6* expression was quantified by qPCR (3 technical replicates). (C) Induction of *CHS6* expression in YPD grown cultures following exposure to CFW (1 hour treatment, 1.5 mg/ml). The bar graph represents sqPCR data and is the average of 4 independent experiments. The actin gene (*ACT1*) was used for normalization in all the expression studies. Y-axis values represent expression relative to untreated WT. (D) Nuclear accumulation of Crz1-GFP following CFW treatment (1 hour, 1.5 mg/ml) is shown on a micrograph. The bar graph represents quantification of nuclear fluorescence. The difference between treated and untreated cells is statistically significant ( $n=50$ ,  $P<0.0001$  in an unpaired two-tailed t-test with Welch correction). The error bars represent standard error. (E) Expression of *CRZ1* and *CHS6* was tested under different temperature conditions and in the presence of 200 mM  $\text{CaCl}_2$  or 2.5 mg/ml CFW (1 hour exposure) by qPCR (3 technical repeats). doi:10.1371/journal.pone.0051403.g005

of more intense fluorescence (Fig. 9). However, these peaks only occasionally overlapped with Crz1-GFP puncta, ruling out targeting of Crz1 to stress granules (Fig. S7).

#### Potential Calcineurin Docking Domain in *CnCrz1*

Similar to other calcineurin substrates, *S. cerevisiae* Crz1 contains a calcineurin docking domain (CDD), or PxIxIT motif, which was first characterized in the mammalian NFAT family of calcineurin-regulated transcription factors [26]. We attempted to identify the PxIxIT motif in *CnCrz1* based on the location and sequence similarity in relation to the confirmed PIISIQ motif in *S. cerevisiae* and the predicted CDD sequences of other fungal CRZs. However, the best candidate,  $^{659}\text{PRLDPD}^{664}$ , is not predicted to constitute a  $\beta$ -sheet which is crucial for interaction with calcineurin [27,28]. We therefore mutagenized two other candidate motifs,  $^{451}\text{PMICIQ}^{456}$  and  $^{394}\text{PNIVTQ}^{399}$  to PMIdQ and PNddTQ respectively, eliminating their predicted  $\beta$ -sheet configuration. However, these modifications did not affect nuclear targeting of the mutant proteins and the formation of fluorescent puncta (our unpublished data).

#### Discussion

In this study we have demonstrated that *CnCrz1* is activated by calcineurin in response to physiological temperature, extracellular calcium and cell wall perturbation, as manifested by its nuclear localization under these conditions. Recently, [17] demonstrated that Crz1 is regulated by PKC under starvation stress and consequently, they referred to Crz1 as Sp1 based on its homology to the Pkc1-dependent specificity protein-1 (Sp1) transcription factors of metazoans. Similar to other fungal CRZ proteins and to the findings of [17], we identified a conserved C-terminal DNA binding domain in *CnCrz1* containing three zinc finger motifs. Although alignment of each of the motifs with homologous motifs of SP1 transcription factors showed significant similarity [17], phylogenetic analysis performed using the entire DNA binding domain containing all three Zn-finger motifs demonstrated that *CnCrz1* is an ortholog of fungal Crz1 proteins. The results of the two studies support a model whereby *CnCrz1*/Sp1 is under dual regulation: under non starvation stress it responds to calcineurin, and under starvation stress it is affected by Pkc1, to restore cell wall integrity.

Deletion of the *CRZ1* gene rendered *C. neoformans* cells sensitive to cell wall perturbing agents, but did not compromise their ability to grow at host physiological temperature, form mating filaments,

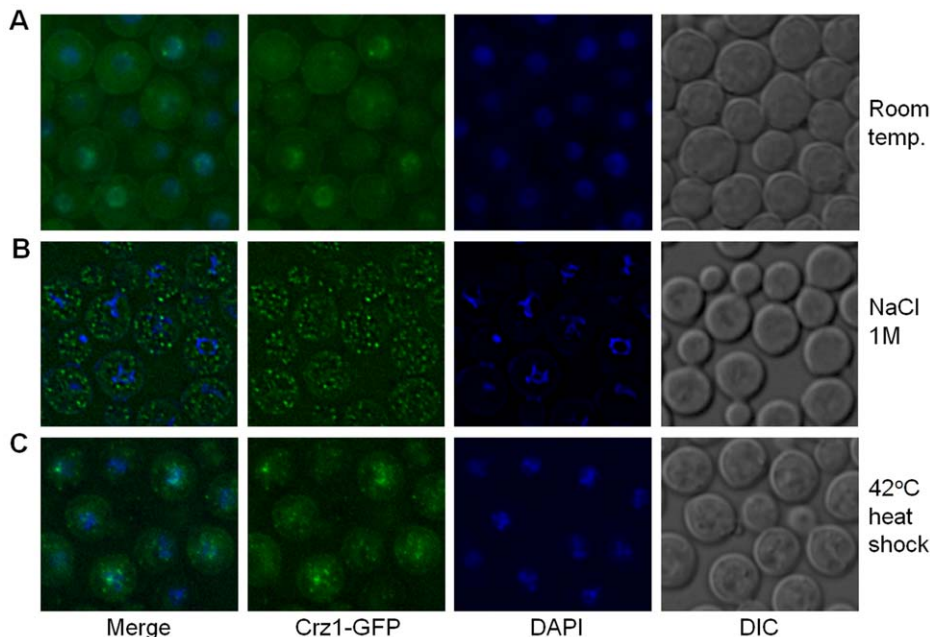

**Figure 6. Salt stress and high temperature trigger punctate localization of Crz1-GFP.** (A) Cells grown at room temperature show predominantly cytosolic and occasional nuclear Crz1-GFP localization, while Crz1-GFP is sequestered in cytosolic puncta in cells treated with 1 M NaCl (B). In cells exposed to 42°C, puncta are localized in and around nuclei (C). doi:10.1371/journal.pone.0051403.g006

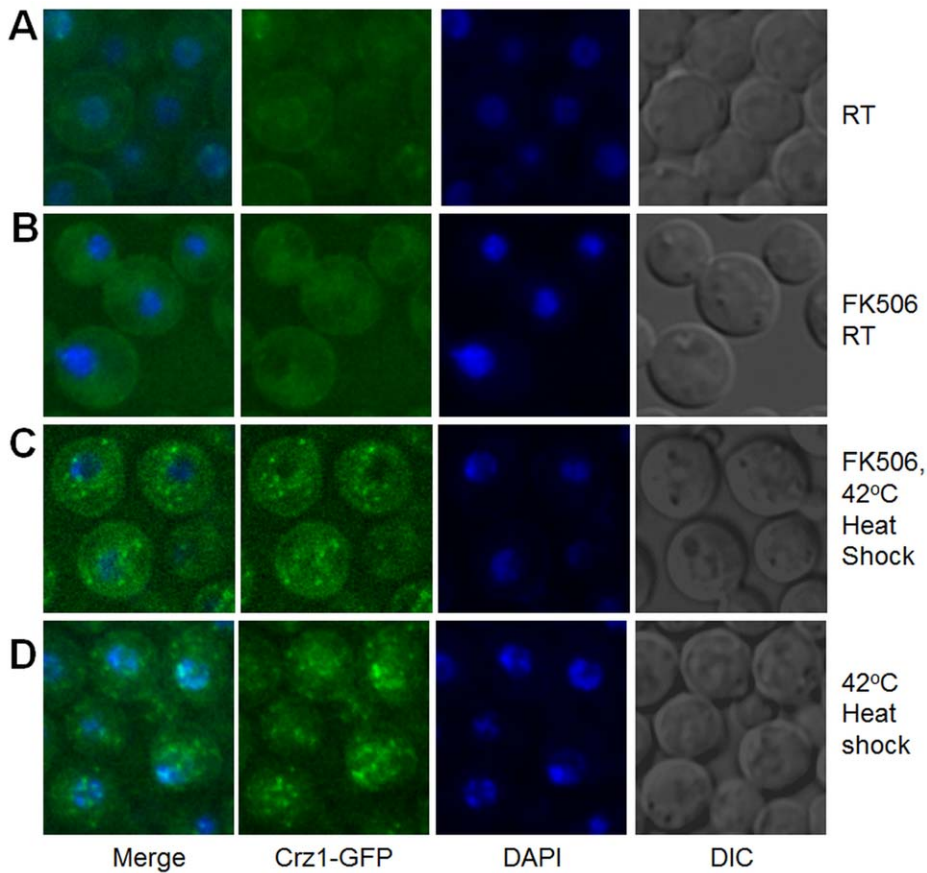

**Figure 7. FK506 causes exclusion of heat shock-induced Crz1-GFP puncta from the nucleus.** *C. neoformans* cells growing at room temperature (A) were treated with 10  $\mu$ g/ml FK506 for 1 hour (B) and then exposed to 42°C for 5 min. The fluorescence pattern was compared in FK506-treated and untreated cells within 45 minutes following heat shock (C, D).  
doi:10.1371/journal.pone.0051403.g007

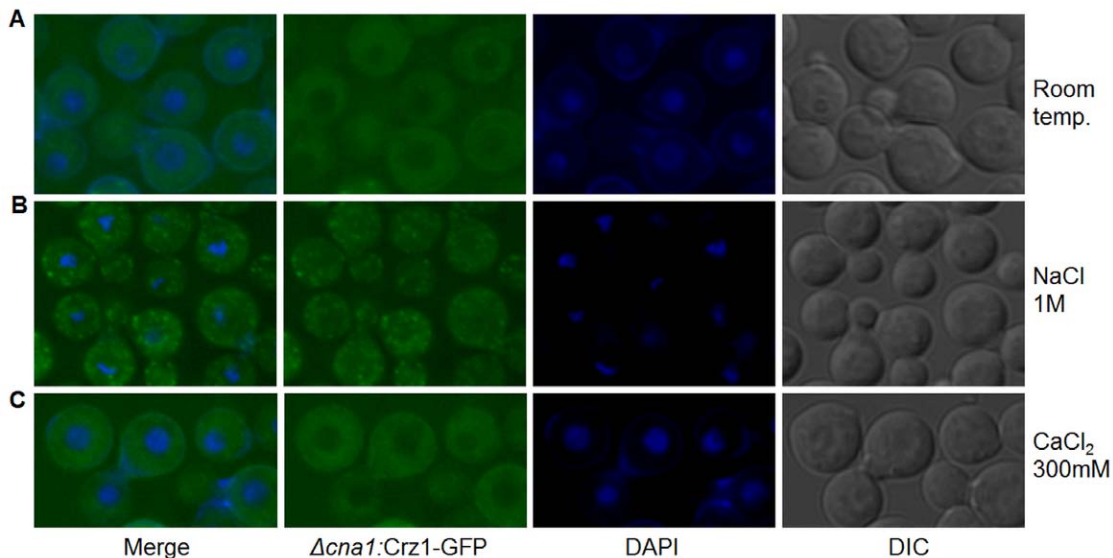

**Figure 8. Calcineurin protein is required for targeting of Crz1-GFP to the nuclei, but not to the cytosolic puncta.** The strain used in all panels is Crz1-GFP: $\Delta$ *cna1*. (A) Crz1-GFP is excluded from the nuclei in  $\Delta$ *cna1* grown at room temperature; (B) 1 M NaCl triggers punctate Crz1-GFP localization even in the absence of calcineurin; (C) addition of calcium fails to trigger nuclear translocation of Crz1-GFP in  $\Delta$ *cna1*.  
doi:10.1371/journal.pone.0051403.g008



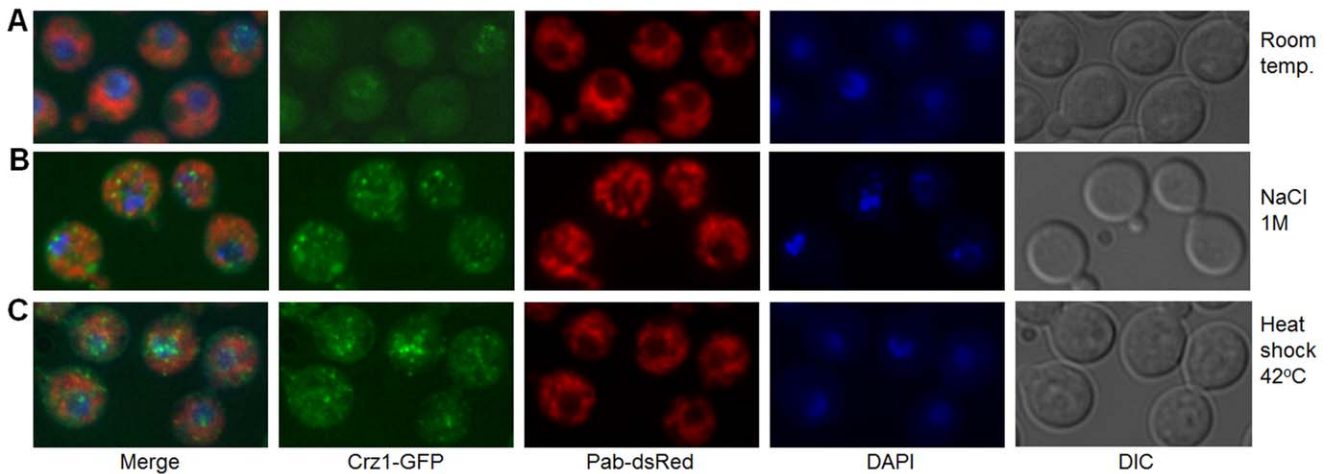

**Figure 9. Crz1-GFP does not co-localize with Pab-dsRed, a marker of stress granules.** (A) Under non-stressful conditions, Pab-dsRed fluorescence concentrates around the nuclei and in the cytosol; (B) salt stress triggers accumulation of Pab-dsRed in cytosolic puncta; (C) Pab-dsRed distribution is partially disrupted following heat shock. doi:10.1371/journal.pone.0051403.g009

or tolerate cations. Taken together these findings suggest that Crz1 is responsible for relaying calcineurin functions related to cell wall integrity. It appears that the role of Crz1 in thermotolerance has been superseded at some point in the evolutionary process by other transcription factors that still remain to be identified. In the pathogenic yeasts, *Candida albicans* and *C. dubliniensis*, Crz1 performs only some functions of calcineurin. For example, growth at high  $\text{Ca}^{2+}$  concentrations, but not resistance to CFW and caspofungin, is regulated by calcineurin via Crz1 [29], while in *S. pombe*, *Acrz1* phenotype differs dramatically from the phenotype of the calcineurin deletion mutant [22]. In contrast, Crz1 and calcineurin mutant phenotypes are very similar in *S. cerevisiae* [30], suggesting that Crz1 is more central to the function of calcineurin in this non-pathogenic yeast.

Despite the species-specific differences in Crz1 function and the low sequence homology among Crz1 proteins, several gene targets are conserved across species. For example in *S. cerevisiae*, calcineurin/Crz1 regulates expression of genes encoding ion pumps required for distinct aspects of ion homeostasis: *PMC1* encodes a  $\text{Ca}^{2+}$ -ATPase responsible for calcium sequestration in vacuoles, and *PMR1* similarly transports  $\text{Ca}^{2+}$  and  $\text{Mn}^{2+}$  into the Golgi; *ENA1*, *ENA2* and *ENA5* encode plasma membrane  $\text{Na}^{+}$ -ATPase exporters [9]. Orthologs of these genes are also regulated by calcineurin and Crz1 in *C. albicans* [21], *C. dubliniensis* [29], *M. oryzae* [14] and *A. fumigatus* [13]. Genes encoding chitin synthases (*CHS*), which are essential for maintaining cell wall integrity, are regulated by calcineurin and Crz1 in *C. albicans* and *S. cerevisiae*, and in the filamentous fungi *M. oryzae* and *A. nidulans* [9,14,15,31,32]. Our study shows that, similar to other fungal species, expression of *CHS6* in *C. neoformans* requires calcineurin and Crz1 under both normal conditions and CFW-induced stress.

In *C. neoformans* cells grown at room temperature, Crz1-GFP was distributed diffusely throughout the cytosol, while being only slightly enriched in some of the nuclei. In both *Δcna1* and the WT incubated with the calcineurin inhibitor FK506, Crz1 was completely excluded from nuclei even under non-inducing conditions, suggesting that calcineurin maintains a basal level of Crz1 activation. Surprisingly, nuclear accumulation of Crz1-GFP was induced by increasing the growth temperature from 25°C to 30°C, the condition under which we observed the highest growth rate (our unpublished observation). This apparent paradox may be

explained by the need to increase Crz1 activity in order to sustain cell wall biogenesis during rapid growth.

Crz1-GFP was activated and localized mainly in nuclei during growth at 37°C. However, despite Crz1 activation, it was dispensable for growth at this temperature (Fig. 3). Similarly, Crz1 was dispensable for growth in the presence of 400 mM  $\text{CaCl}_2$ , despite having translocated to the nucleus. The phenomenon of activation without apparent function has been described for *S. pombe* Prz1 where activity of the reporter gene fused to the calcineurin/Prz1-dependent response element, was increased 19-fold following exposure to 0.3 M KCl [33]. However, unlike the calcineurin-deficient mutant, *Δprz1* was resistant to the ionic stress caused by KCl [22]. Positive correlation between *C. neoformans* Crz1 nuclear accumulation and the ensuing physiological response was observed in the case of cell wall perturbation by CFW, where a modest increase in Crz1 nuclear localization correlated with the induction of the Crz1-dependent chitin synthase gene *CHS6*, followed by establishment of Crz1-mediated tolerance to CFW and Congo red. In accordance with its importance in maintaining cell wall integrity, *CnCRZ1* expression was up-regulated in the presence of calcofluor white. However, *CnCRZ1* was down-regulated in response to calcium, in contrast to *C. albicans* *CRZ1* [21]. This difference correlates with the importance of Crz1 for tolerance to calcium-induced stress in *C. albicans*, but not in *C. neoformans*.

In contrast to nuclear translocation of Crz1 in cultures growing at 37°C, heat shock (5 min at 42°C) and exposure to high concentrations of NaCl resulted in Crz1 localization in cytosolic and nuclear puncta. Targeting of Crz1-GFP into cytosolic puncta did not require calcineurin since addition of FK506 or deletion of *CNA1* failed to prevent their formation. However, addition of FK506 caused exclusion of puncta from nuclei, suggesting that the nuclear localization of Crz1 following heat shock is calcineurin-dependent. Taken together, these findings suggest that *C. neoformans* Crz1 accumulates in nuclei in response to a  $\text{Ca}^{2+}$ /calcineurin-mediated signal, whereas its localization in cytosolic puncta is calcineurin-independent.

Interestingly, it was recently shown that *C. neoformans* calcineurin is targeted to ER-associated puncta in response to a rapid temperature shift from 24°C to 37°C, and that this targeting does not require its phosphatase activity [8,18,19]. Moreover, *C.*

*neoformans* calcineurin accumulated in cytosolic puncta in response to high salt [18]. Some of the puncta formed in response to the temperature shift co-localized with mRNA processing structures (stress granules and P-bodies) and with components of the ER-Golgi trafficking machinery [18]. We did not observe significant overlap between fluorescence of Crz1-GFP and the stress granule marker Pab following heat shock or high salt exposure, consistent with calcineurin and Crz1 being in separate compartments under these stress conditions.

Although a rapid temperature shift from 24°C to 37°C caused punctate calcineurin localization, in cells that had adjusted to the elevated temperature (after 45 minutes incubation at 37°C), calcineurin assumed a diffuse cytosolic distribution [18]. Since Crz1 is nuclear in cells that have been continuously grown at 37°C, it is likely to be activated and directed to the nucleus by the diffusely-distributed calcineurin. Puncta-associated calcineurin may therefore affect different calcineurin substrates. In support of this hypothesis, phospholipid-binding protein, Cts1 (another calcineurin substrate), co-localized with calcineurin in cytosolic puncta and also co-immunoprecipitated with Cna1, with greater complex formation at 37°C compared to 24°C, suggesting that Cts1 is a substrate of calcineurin during high temperature stress [8].

Calcineurin-independent CRZ signaling has been reported in fungi. For example, in *C. dubliniensis*, Crz1 regulates a thigmotropic (surface sensing) response independently of calcineurin [29]. Similarly, in *C. neoformans*, Crz1 is involved in response to glucose starvation independently of calcineurin [17]. It is possible that in glucose-starved cells calcineurin, at least in part, migrates to stress granules and P-bodies, which are known to form in yeast cells under these conditions [34,35] thereby relinquishing control over Crz1. Consistent with this hypothesis, Crz1 regulates a set of calcineurin-independent genes in conjunction with Pkc1 under conditions of glucose starvation [17].

Crz1-GFP puncta formation may be a part of a stress adaptation mechanism, since this phenomenon is only temporary and the puncta disappear following adaptation to a new condition. Alternatively, it could be a manifestation of the partial unfolding of Crz1 during severe stress and the subsequent aggregation of unfolded protein into large protein complexes. In support of this hypothesis, Crz1 is dispensable for high salt tolerance, a condition where we demonstrated the formation of multiple Crz1-associated cytosolic puncta. Moreover, Crz1 contains a short polyglutamine motif and polyglutamines are known to promote protein aggregation, especially in response to stress [36].

In summary we have shown that Crz1 is a *bona fide* target of calcineurin in *C. neoformans* and have identified unique features of this transcription factor. To our knowledge Crz1 of *C. neoformans* is the only fungal homologue reported to manifest stimulus-specific calcineurin-dependent and independent responses to environmental stresses. The physiological significance of the punctate Crz1 distribution and the identity of the target structures remain to be determined.

## Materials and Methods

### Strains and Media

Wild-type *C. neoformans* var. *grubii* strain H99 (serotype A, *MATa*) was used in this study (WT). The strains Crz1-GFP, *Acrz1*, Crz1-GFP:Pab-dsRed were created from H99 (Fig. S3). The calcineurin (*Acna1*) and G-protein  $\alpha$  subunit (*Agha1*) deletion strains were kindly provided by Joseph Heitman and Andy Alspaugh, respectively (Duke University, Durham, NC, USA). The KUTAP vector containing GFP optimized for fluorescence in *C. neoformans*

was a gift from Peter Williamson (NIAID, NIH, Bethesda, MA, USA). All strains were routinely cultured on YPD medium (1% yeast extract, 2% peptone and 2% dextrose). L-DOPA agar (1 g/l L-asparagine, 0.5 g/l MgSO<sub>4</sub>, 3 g/l KH<sub>2</sub>PO<sub>4</sub>, 1 mg/l thiamine, 1 mM L-DOPA) was used to test melanization. Capsules were induced on RPMI agar (RPMI, 2% glucose, 0.165 M MOPS pH 7, 1.5% bacto agar, 0.03% glutamine) by incubation at 37°C in a 5% CO<sub>2</sub> atmosphere for 3 days. V8 mating medium was prepared as described previously [23].

### *C. neoformans* CRZ1 Identification and Comparison with Other Species

To identify a putative *C. neoformans* Crz1 ortholog, the H99 genome ([http://www.broadinstitute.org/annotation/genome/cryptococcus\\_neoformans/Blast.html](http://www.broadinstitute.org/annotation/genome/cryptococcus_neoformans/Blast.html)) was searched with the C-terminal sequence of *S. cerevisiae* Crz1. CNAG\_00156 showed significant homology to the *S. cerevisiae* gene and was designated *CnCRZ1*. The following fungal proteins were used for the alignment: Cn\_H99, *Cryptococcus neoformans* serotype A; Cn\_JEC21, XP\_566613, *C. neoformans* serotype D; An, BAE94327, *Aspergillus nidulans*; Ao, BAE57003, *Aspergillus oryzae*; Af, EAL88401, *Aspergillus fumigatus*; Mo, XP\_359644, *Magnaporthe oryzae*; Nc, EAA32849, *Neurospora crassa*; EAQ88414, Chg, *Chaetomium globosum*; Gz, XP\_381517, *Gibberella zeae*; Ci, XP\_001244584, *Coccidioides immitis*; Pn, EAT87393, *Phaeosphaeria nodorum*; Dh, CAG84727, *Debaryomyces hansenii*; Td, AAZ04388, *Torulopsis delbrueckii*; Ag, AAS51722, *Ashbya gossypii*; Sc, CAA95889, *Saccharomyces cerevisiae*; Kl, CAG99429, *Kluyveromyces lactis*; Yl, CAG80473, *Yarrowia lipolytica*; Ca, EAK97605, *Candida albicans*; Cgl, CAG62620, *Candida glabrata*; Sp, Q09838, *Schizosaccharomyces pombe*; Cd, CAX43071, *Candida dubliniensis*; Sc\_Ace2, CAA97702, *Saccharomyces cerevisiae*; Sc\_Swi5, CAA90369, *Saccharomyces cerevisiae*. Zinc finger domain sequences were manually extracted from the alignment and used for phylogenetic analysis (Fig. S1). The analysis was performed on the Phylogeny.fr platform. The phylogenetic tree was reconstructed using the maximum likelihood method [37].

### Yeast Two Hybrid Analysis

*CRZ1* and *CNA1* were PCR amplified from *C. neoformans* cDNA using primers listed in Table S1 and cloned into pGADT7 (prey) and pGBKT7 (bait) vectors (Clontech), respectively. Growth of AH109 yeast (Clontech) expressing both bait and prey vectors was tested on SD medium lacking leucine and tryptophan to select for each vector, and histidine and adenine to test for an interaction. Empty pGBKT7 and pGADT7 were used as negative controls. Since Cna1 fused to the GAL4 binding domain exhibited background activation of the *HIS3* reporter, only *ADE2* and *lacZ* reporter genes were used to test Crz1-Cna1 interaction. LacZ activity was assayed using the X-gal overlay method [38]. To quantify  $\beta$ -galactosidase activity, yeast cells were grown overnight on SD plates without leucine and tryptophan supplemented with 1  $\mu$ g/ml FK506. The ONPG liquid culture assay was performed as described in the Clontech Yeast Protocol Handbook, using cells collected from plates rather than YPD broth cultures.

### Generation of Transgenic Strains Via Double Cross-over Recombination

Plasmids pJAF (containing a Neomycin resistance cassette, NEO<sup>R</sup>) and pCH233 (containing a Nourseothricin resistance cassette, NAT<sup>R</sup>) were kindly provided by Dr John R Perfect, Duke University, Durham, NC, USA. A *CRZ1* gene deletion construct was made by overlap PCR, joining 5' flank (1092 bp sequence

upstream of *CRZ1*),  $NEO^R$  from pJAF (*ACT1* promoter, neomycin phosphotransferase, *TRP1* terminator) and 3' flank (1049 bp downstream of *CRZ1*) (see Table S1 for primer sequences and Fig. S3 for the recombination diagram). A CRZ1-GFP construct designed to introduce *GFP* at the 3' end of the endogenous *CRZ1* gene was generated by joining the 5' flank (last 1148 bp of the *CRZ1* gene excluding the stop codon), *GFP* and the elongation factor 1 terminator (*EF1T*) from KUTAP,  $NEO^R$ , and the 3' flank (950 bp downstream of *CRZ1*) (Table S1, Fig. S3). For *Δcrz1* reconstitution, the antibiotic resistance of *Δcrz1* was changed from  $NEO$  to  $NAT$  by transforming *Δcrz1*( $NEO^R$ ) with a  $NAT$  resistance cassette, creating *Δcrz1*( $NAT^R$ ). The genomic *CRZ1* sequence including the promoter and ORF (4969 bp) was fused to the GFP-EF1T- $NEO^R$  fragment in the pCR2.1 cloning vector (Life Technologies). Linearized plasmid was transformed into *Δcrz1*( $NAT^R$ ) to allow ectopic integration of the CRZ1-GFP-EF1T- $NEO^R$  fragment into the genome. A PAB-dsRED vector designed to introduce *dsRED-Express* (Clontech) at the 3' end of the endogenous *PAB* gene (CNAG\_04441) was generated by joining the 5' flank (last 945 bp of *PAB* gene excluding stop codon), *dsRED*, *EF1* terminator (from KUTAP),  $NAT^R$  from pCH233 (*ACT1* promoter, nourseothricin acetyltransferase, *TRP1* terminator), and the 3' flank (1108 bp downstream of *PAB*).

Transformation of each of the constructs described above was carried out using the biolistic method [39].  $NEO$  or  $NAT$  resistant transformants were selected on YPD agar plates supplemented with 0.5 M sorbitol and 200  $\mu$ g/ml G418 or 100  $\mu$ g/ml Nourseothricin, respectively. Correctly targeted integration of each of the constructs was confirmed by PCR amplification across the junction point of integration of the vector with genomic DNA, using a forward primer that anneals outside the region of integration and a reverse primer that anneals within the construct. (Fig. S3). Potential contamination of positive transformants with WT was ruled out by performing a PCR with primers annealing specifically to the region of the gene being deleted and demonstrating absence of a PCR product of the expected size and by the absence of gene expression using RT-PCR. To test the expression of recombinant genes, we isolated RNA from the YPD-grown cultures: cell pellets were disrupted with glass beads in the presence of Trizol reagent (Ambion) using a beat-beater. RNA was subsequently extracted according to manufacturer's instructions. RNA was treated with DNase I and cDNA was synthesized using Invitrogen SuperScript II cDNA synthesis kit.

## Gene Expression

To test chitin synthase *CHS6* expression (Fig. 7A, B, C) the cells were cultured in YPD overnight at 30°C and diluted to OD 0.5 in the morning. After an additional 4 hours incubation, the cells were treated with CFW (1.5–2.2 mg/ml, as indicated) and/or FK506 (10  $\mu$ g/ml) for 1 hour. To test the expression of *CRZ1* and *CHS6* under different stress conditions (Fig. 7E), the cells were grown overnight at 25°C, diluted to OD = 0.5 and incubated for 5 hours at 25°C, 30°C and 37°C. For the cell wall and ionic stresses, cells which had been grown at 25°C were supplemented with 2.5 mg/ml CFW or 200 mM  $CaCl_2$  for 1 hour. The cells were collected, snap-frozen and RNA extraction and cDNA synthesis were performed as described above. Semi-quantitative and real time PCR was performed using the actin-encoding gene (*ACT1*) for normalization.

## Microscopy

For microscopy, the cells were routinely cultured in YPD medium overnight at room temperature (unless specified otherwise), diluted 1:5 and incubated for an additional 4–5 hours. In

some experiments, 10  $\mu$ g/ml FK506 was added to the cultures 1 hour prior to microscopic observation. The cells were treated with 1 M NaCl or 100–300 mM  $CaCl_2$  for 5 min, pelleted and observed under the microscope within 30 min. CFW (1.5 mg/ml) was added to the cells for 1 hour followed by washing with YPD to remove debris. For heat shock, the cells were prepared for microscopy and the glass slides were placed on a heating block set on 42°C for 10 min. In some experiments, the cells were stained with 4',6-diamidino-2-phenylindole (DAPI, 1  $\mu$ g/ml) without fixation and immediately observed under the Deltavision Deconvolution microscope. Nuclear fluorescence was quantified using ImageJ software (NIH).

## Supporting Information

**Figure S1 Alignment of zinc finger-containing domains of fungal Crz1 proteins and two related transcription factors, ScAce2 and ScSwi5.** Cn\_H99, *Cryptococcus neoformans* serotype A; Cn\_JEC21, XP\_566613, *C. neoformans* serotype D; An, BAE94327, *Aspergillus nidulans*; Ao, BAE57003, *Aspergillus oryzae*; Af, EAL88401, *Aspergillus fumigatus*; Mo, XP\_359644, *Magnaporthe oryzae*; Nc, EAA32849, *Neurospora crassa*; EAQ88414, Chg, *Chaetomium globosum*; Gz, XP\_381517, *Gibberella zeae*; Ci, XP\_001244584, *Coccidioides immitis*; Pn, EAT87393, *Phaeosphaeria nodorum*; Dh, CAG84727, *Debaryomyces hansenii*; Td, AAZ04388, *Tonulasporea delbrueckii*; Ag, AAS51722, *Ashbya gossypii*; Sc, CAA95889, *Saccharomyces cerevisiae*; Kl, CAG99429, *Kluyveromyces lactis*; Yl, CAG80473, *Yarrowia lipolytica*; Ca, EAK97605, *Candida albicans*; Cgl, CAG62620, *Candida glabrata*; Sp, Q09838, *Schizosaccharomyces pombe*; Cd, CAX43071, *Candida dubliniensis*; Sc\_Ace2, CAA97702, *Saccharomyces cerevisiae*; Sc\_Swi5, CAA90369, *Saccharomyces cerevisiae*. Identical amino acids: \*, red. Strongly and weakly similar amino acids: ':', green, and ':', blue, respectively. (PDF)

**Figure S2 CRZ1 deletion, Δcrz1 reconstitution, strategy to create CRZ1-GFP gene fusion, and verification of transformants.** (A) *CRZ1* promoter and coding region including introns were fused to *GFP*, terminator *EF1T* and neomycin resistance cassette in pCR2.1 cloning vector to create *Δcrz1* reconstitution construct (*EF1T*, elongation factor 1 terminator; *GFP*, green fluorescent protein; *NEO*, neomycin phosphotransferase; *ActP*, *ACT1* promoter; *Ttrp*, *TRP1* terminator) (B) To create GFP-tagged *CRZ1*, *GFP* was integrated downstream of the endogenous *CRZ1* by double cross-over recombination as indicated. Black arrows denote primers used in overlap PCR to create the construct and verify transformants. Primer regions not homologous to the template are indicated by diagonal lines. (C) Deletion of *CRZ1* by double cross-over recombination; (D and E) Verification of *CRZ1-GFP* expressing strain using genomic DNA and cDNA templates respectively; (F) Verification of *CRZ1-GFP* integration in *Δcna1* mutant using genomic DNA as a template; (G) Confirmation of *CRZ1* gene deletion using genomic DNA as a template. Primers pairs used for transformant verification: 1. CRZ1-2462-s – a-GFP; 2. CRZ1-2462-s – GFP-a; 3. CRZ1-ots-s – GFP-a; 4. CRZ1-2462-s – CRZ1-3'UTR-a; 5. *ActP*-s – CRZ1.ExFP1; 6. *Ttrp*-s – CRZ1.ExRP2; 7. CRZ1-s – CRZ1-a. (Diagrams show shortened primer names). (TIF)

**Figure S3 Virulence-related traits are not compromised in Δcrz1.** (A) Capsule size of WT H99, *Δcrz1* and *Δcna1* was visualized following growth under capsule-inducing conditions. The G-protein  $\alpha$  subunit mutant *Δgpa1*, which has reduced capsule size, was used as a control for capsule induction. (B)

Mating filaments production in crosses between WT KN99 MAT $\alpha$  and WT,  $\Delta crz1$  and  $\Delta cna1$  (MAT $\alpha$ ), respectively. Consistent with Cruz, 2001, mating filament production was defective in the  $\Delta cna1$  strain used here as a control (C) Melanization of the  $\Delta crz1$  mutant as compared to WT and the melanin-deficient control strain,  $\Delta gpal$ , following growth on L-DOPA.

(TIF)

**Figure S4 Crz1-GFP fusion protein is functional as indicated by the transgenic strain resistance to calcofluor white.** Cells were spotted at 10-fold serial dilutions  $10^6$ – $10^0$  cells/spot from left to right.

(TIF)

**Figure S5 Continuously elevated temperature and heat shock cause different patterns of Crz1-GFP localization.** Being predominantly cytosolic at room temperature (A), Crz1-GFP translocates to the nuclei in cells grown at 37°C and 39°C (B, C), while abrupt temperature change (heat shock) causes punctate Crz1-GFP fluorescence concentrated in and around the nuclei (D).

(TIF)

**Figure S6 CFW fails to activate Crz1 in the calcineurin-deficient mutant.**  $\Delta cna1$ /Crz1-GFP (A) and WT/Crz1-GFP (B) strains grown in YPD were exposed to CFW (1.5 mg/ml) for 1 hour. Nuclear targeting of Crz1-GFP in response to CFW is abolished in the  $\Delta cna1$  mutant (C), while clearly detectable in WT (D).

## References

- Kontoyiannis DP, Lewis RE, Alexander BD, Lortholary O, Dromer F, et al. (2008) Calcineurin inhibitor agents interact synergistically with antifungal agents in vitro against *Cryptococcus neoformans* isolates: correlation with outcome in solid organ transplant recipients with cryptococcosis. *Antimicrob Agents Chemother* 52: 735–738.
- Singh N, Alexander BD, Lortholary O, Dromer F, Gupta KL, et al. (2007) *Cryptococcus neoformans* in organ transplant recipients: impact of calcineurin-inhibitor agents on mortality. *J Infect Dis* 195: 756–764.
- Liu J, Farmer JD Jr, Lane WS, Friedman J, Weissman I, et al. (1991) Calcineurin is a common target of cyclophilin-cyclosporin A and FKBP-FK506 complexes. *Cell* 66: 807–815.
- Cruz MC, Del Poeta M, Wang P, Wenger R, Zenke G, et al. (2000) Immunosuppressive and nonimmunosuppressive cyclosporine analogs are toxic to the opportunistic fungal pathogen *Cryptococcus neoformans* via cyclophilin-dependent inhibition of calcineurin. *Antimicrob Agents Chemother* 44: 143–149.
- Del Poeta M, Cruz MC, Cardenas ME, Perfect JR, Heitman J (2000) Synergistic antifungal activities of baflomycin A(1), fluconazole, and the pneumocandin MK-0991/caspofungin acetate (L-743,873) with calcineurin inhibitors FK506 and L-685,818 against *Cryptococcus neoformans*. *Antimicrob Agents Chemother* 44: 739–746.
- Odom A, Muir S, Lim E, Toffaletti DL, Perfect J, et al. (1997) Calcineurin is required for virulence of *Cryptococcus neoformans*. *EMBO J* 16: 2576–2589.
- Cruz MC, Fox DS, Heitman J (2001) Calcineurin is required for hyphal elongation during mating and haploid fruiting in *Cryptococcus neoformans*. *EMBO J* 20: 1020–1032.
- Aboobakar EF, Wang X, Heitman J, Kozubowski L (2011) The C2 domain protein Cts1 functions in the calcineurin signaling circuit during high temperature stress responses in *Cryptococcus neoformans*. *Eukaryot Cell*.
- Yoshimoto H, Saltsman K, Gasch AP, Li HX, Ogawa N, et al. (2002) Genome-wide analysis of gene expression regulated by the calcineurin/Crz1p signaling pathway in *Saccharomyces cerevisiae*. *J Biol Chem* 277: 31079–31088.
- Stathopoulos-Gerontides A, Guo JJ, Cyert MS (1999) Yeast calcineurin regulates nuclear localization of the Crz1p transcription factor through dephosphorylation. *Genes Dev* 13: 798–803.
- Santos M, de Larrinoa IF (2005) Functional characterization of the *Candida albicans* CRZ1 gene encoding a calcineurin-regulated transcription factor. *Curr Genet* 48: 88–100.
- Schumacher J, de Larrinoa IF, Tudzynski B (2008) Calcineurin-responsive zinc finger transcription factor CRZ1 of *Botrytis cinerea* is required for growth, development, and full virulence on bean plants. *Eukaryot Cell* 7: 584–601.
- Soriani FM, Malavazi I, da Silva Ferreira ME, Savoldi M, Von Zeska Kress MR, et al. (2008) Functional characterization of the *Aspergillus fumigatus* CRZ1 homologue, CrzA. *Mol Microbiol* 67: 1274–1291.
- Choi J, Kim Y, Kim S, Park J, Lee YH (2009) MoCRZ1, a gene encoding a calcineurin-responsive transcription factor, regulates fungal growth and pathogenicity of *Magnaporthe oryzae*. *Fungal Genet Biol* 46: 243–254.
- Spielvogel A, Findon H, Arst HN, Araujo-Bazan L, Hernandez-Ortiz P, et al. (2008) Two zinc finger transcription factors, CrzA and SltA, are involved in cation homeostasis and detoxification in *Aspergillus nidulans*. *Biochem J* 414: 419–429.
- Zhang H, Zhao Q, Liu K, Zhang Z, Wang Y, et al. (2009) MgCRZ1, a transcription factor of *Magnaporthe grisea*, controls growth, development and is involved in full virulence. *FEMS Microbiol Lett* 293: 160–169.
- Adler A, Park YD, Larsen P, Nagarajan V, Wollenberg K, et al. (2011) A Novel Specificity Protein 1 (SP1)-like Gene Regulating Protein Kinase C-1 (Pkc1)-dependent Cell Wall Integrity and Virulence Factors in *Cryptococcus neoformans*. *J Biol Chem* 286: 20977–20990.
- Kozubowski L, Aboobakar EF, Cardenas ME, Heitman J (2011) Calcineurin colocalizes with P-bodies and stress granules during thermal stress in *Cryptococcus neoformans*. *Eukaryot Cell*.
- Kozubowski L, Thompson JW, Cardenas ME, Moseley MA, Heitman J (2011) Association of calcineurin with the COPI protein Sec28 and the COPII protein Sec13 revealed by quantitative proteomics. *PLoS One* 6: e25280.
- Boustany LM, Cyert MS (2002) Calcineurin-dependent regulation of Crz1p nuclear export requires Msn5p and a conserved calcineurin docking site. *Genes Dev* 16: 608–619.
- Karababa M, Valentino E, Pardini G, Coste AT, Bille J, et al. (2006) CRZ1, a target of the calcineurin pathway in *Candida albicans*. *Mol Microbiol* 59: 1429–1451.
- Hirayama S, Sugiura R, Lu Y, Maeda T, Kawagishi K, et al. (2003) Zinc finger protein Prz1 regulates Ca<sup>2+</sup> but not Cl<sup>-</sup> homeostasis in fission yeast. Identification of distinct branches of calcineurin signaling pathway in fission yeast. *J Biol Chem* 278: 18078–18084.
- Elorza MV, Rico H, Sentandreu R (1983) Calcofluor white alters the assembly of chitin fibrils in *Saccharomyces cerevisiae* and *Candida albicans* cells. *J Gen Microbiol* 129: 1577–1582.
- Kraus PR, Boily MJ, Giles SS, Stajich JE, Allen A, et al. (2004) Identification of *Cryptococcus neoformans* temperature-regulated genes with a genomic-DNA microarray. *Eukaryot Cell* 3: 1249–1260.
- Williams KE, Cyert MS (2001) The eukaryotic response regulator Skn7p regulates calcineurin signaling through stabilization of Crz1p. *EMBO J* 20: 3473–3483.
- Aramburu J, Garcia-Cozar F, Raghavan A, Okamura H, Rao A, et al. (1998) Selective inhibition of NFAT activation by a peptide spanning the calcineurin targeting site of NFAT. *Mol Cell* 1: 627–637.
- Li H, Zhang L, Rao A, Harrison SC, Hogan PG (2007) Structure of calcineurin in complex with PVIVIT peptide: portrait of a low-affinity signalling interaction. *J Mol Biol* 369: 1296–1306.

28. Takeuchi K, Rochl MH, Sun ZY, Wagner G (2007) Structure of the calcineurin-NFAT complex: defining a T cell activation switch using solution NMR and crystal coordinates. *Structure* 15: 587–597.
29. Chen YL, Brand A, Morrison EL, Silao FG, Bigol UG, et al. (2011) Calcineurin controls drug tolerance, hyphal growth, and virulence in *Candida dubliniensis*. *Eukaryot Cell* 10: 803–819.
30. Stathopoulos AM, Cyert MS (1997) Calcineurin acts through the CRZ1/TCN1-encoded transcription factor to regulate gene expression in yeast. *Genes Dev* 11: 3432–3444.
31. Munro CA, Selvaggini S, de Bruijn I, Walker L, Lenardon MD, et al. (2007) The PKC, HOG and Ca<sup>2+</sup> signalling pathways co-ordinately regulate chitin synthesis in *Candida albicans*. *Mol Microbiol* 63: 1399–1413.
32. Kim S, Hu J, Oh Y, Park J, Choi J, et al. (2010) Combining ChIP-chip and expression profiling to model the MoCRZ1 mediated circuit for Ca/calcineurin signaling in the rice blast fungus. *PLoS Pathog* 6: e1000909.
33. Deng L, Sugiura R, Takeuchi M, Suzuki M, Ebina H, et al. (2006) Real-time monitoring of calcineurin activity in living cells: evidence for two distinct Ca<sup>2+</sup>-dependent pathways in fission yeast. *Mol Biol Cell* 17: 4790–4800.
34. Nilsson D, Sunnerhagen P (2011) Cellular stress induces cytoplasmic RNA granules in fission yeast. *RNA* 17: 120–133.
35. Buchan JR, Muhlrud D, Parker R (2008) P bodies promote stress granule assembly in *Saccharomyces cerevisiae*. *J Cell Biol* 183: 441–455.
36. Ding Q, Lewis JJ, Strum KM, Dimayuga E, Bruce-Keller AJ, et al. (2002) Polyglutamine expansion, protein aggregation, proteasome activity, and neural survival. *J Biol Chem* 277: 13935–13942.
37. Dereeper A, Guignon V, Blanc G, Audic S, Buffet S, et al. (2008) Phylogeny.fr: robust phylogenetic analysis for the non-specialist. *Nucleic Acids Res* 36: W465–469.
38. Hsu PC, Yang CY, Lan CY (2011) *Candida albicans* Hap43 is a repressor induced under low-iron conditions and is essential for iron-responsive transcriptional regulation and virulence. *Eukaryot Cell* 10: 207–225.
39. Toffaletti DL, Rude TH, Johnston SA, Durack DT, Perfect JR (1993) Gene transfer in *Cryptococcus neoformans* by use of biolistic delivery of DNA. *J Bacteriol* 175: 1405–1411.
